# Supplementary material for: Blood transcriptomes of anti-SARS-CoV2 antibody positive healthy individuals with prior asymptomatic versus clinical infection
Source: bioRxiv or medRxiv preprint supplement (doi:10.1101/2021.04.19.21255748), 2021-04-30
Supplement: Supplementary file [file media-2.pdf]

## S2 Table

Information on the function of genes with increased expression in prior asymptomatic versus clinical SARS-CoV-2 infection

| Gene                            | Description and Biological Terms Related (if applicable)                                                                                                                                                                                                                                                                                                                                                                                                                                                                                                                                                                          |
|---------------------------------|-----------------------------------------------------------------------------------------------------------------------------------------------------------------------------------------------------------------------------------------------------------------------------------------------------------------------------------------------------------------------------------------------------------------------------------------------------------------------------------------------------------------------------------------------------------------------------------------------------------------------------------|
| <b>DUSP8</b>                    | Dual Specificity Phosphatase 8<br>Pathways: Signaling by GPCR and MAPK signaling pathway<br>Terms: phosphatase activity and protein tyrosine/serine/threonine phosphatase activity                                                                                                                                                                                                                                                                                                                                                                                                                                                |
| <b>CACNA2D2</b>                 | Calcium Voltage-Gated Channel Auxiliary Subunit Alpha2delta 2<br>Pathways: ERK Signaling and Activation of cAMP-Dependent PKA.<br>Terms: voltage-gated calcium channel activity and calcium channel regulator activity                                                                                                                                                                                                                                                                                                                                                                                                            |
| <b>GCAT</b>                     | Glycine C-Acetyltransferase<br>Pathways: Glycine, serine and threonine metabolism, Viral mRNA Translation.<br>Terms: pyridoxalphosphatebinding and glycine C-acetyltransferaseactivity.                                                                                                                                                                                                                                                                                                                                                                                                                                           |
| <b>GZMH</b>                     | GranzymeH<br>Reported to be constitutively expressed in the NK (natural killer) cells of the immune system and may play a role in the cytotoxic arm of the innate immune response by inducing target cell death and by directly cleaving substrates in pathogen-infected cells. [RefSeq, Nov 2015]<br>Pathways are Peptide hormone metabolism and Metabolism of proteins.<br>Terms: serine-type endopeptidase activity.                                                                                                                                                                                                           |
| <b>CLEC12A</b><br><b>(MICL)</b> | C-lectine-like receptor<br>Pathways are Innate Immune System and C-type lectin receptor signaling pathway.<br>Terms: includecarbohydratebinding.                                                                                                                                                                                                                                                                                                                                                                                                                                                                                  |
| <b>CLEC1B</b><br><b>(CLEC2)</b> | C-Type Lectin Domain Family 1 Member B<br>Natural killer (NK) cells express multiple calcium-dependent (C-type) lectin-like receptors, such as CD94 and NKG2D, that interact with major histocompatibility complex class I molecules and either inhibit or activate cytotoxicity and cytokine secretion. CLEC2 is a C-type lectin-like receptor expressed in myeloid cells and NK cell (Colonna et al., 2000 [PubMed 10671229])<br>Pathways: Response to elevated platelet cytosolic Ca <sup>2+</sup> and C-type lectin receptor signaling pathway.<br>Terms: transmembrane signaling receptor activity and carbohydrate binding. |
| <b>BEX5</b>                     | Brain expressed X-linked5, Nerve Growth Factor Receptor-Associated Protein 2 [Alvarez et al. 2005]                                                                                                                                                                                                                                                                                                                                                                                                                                                                                                                                |
| <b>ENC1</b>                     | Ectodermal-Neural Cortex 1<br>Pathways are WNT Signaling.<br>Terms: actinbinding.                                                                                                                                                                                                                                                                                                                                                                                                                                                                                                                                                 |
| <b>CYP3A43</b>                  | Cytochrome P450 Family 3 Subfamily A Member 43<br>Pathways are Paroxetine Pathway, Pharmacokinetics and Drug metabolism - cytochrome P450.<br>Terms: iron ion binding and oxidoreductase activity, acting on paired donors, with incorporation or reduction of molecular oxygen                                                                                                                                                                                                                                                                                                                                                   |
