# Supplementary material for: Blood transcriptomes of anti-SARS-CoV2 antibody positive healthy individuals with prior asymptomatic versus clinical infection
Source: bioRxiv or medRxiv preprint supplement (doi:10.1101/2021.04.19.21255748), 2021-04-30

# S1 Figure

A.

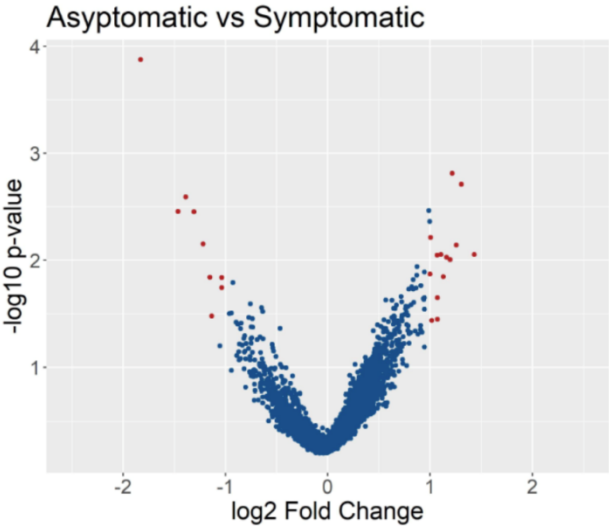

B.

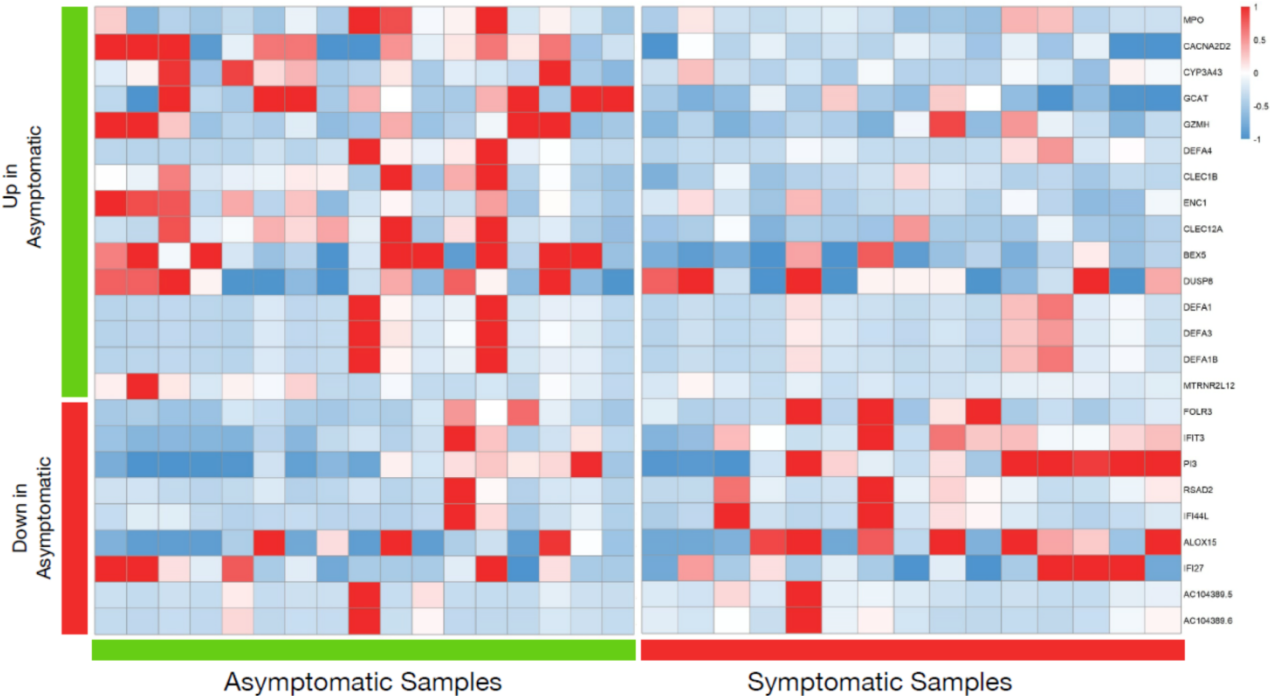

Supplement: Supplementary file [file media-3.pdf]
